# Supplementary material for: Highly transparent polyimides derived from 2-phenyl-4,6-bis(4-aminophenoxy)pyrimidine and 1,3-bis(5-amino-2-pyridinoxy)benzene: preparation, characterization, and optical properties
Source: Royal Society of Chemistry journal article supplement (doi:10.1039/c5ra19167j), 2015-01-01
Supplement: c5ra19167j1.pdf [file c5ra19167j1.pdf]

## Supporting Information for

### High transparent polyimides derived from 2-phenyl-4,6-bis(4-aminophenoxy) Pyrimidine and 1,3-bis(5-amino-2-pyridinoxy)benzene: Preparation, characterization, and optical properties

Chunbo Wang<sup>a</sup>, Yue Guan<sup>a</sup>, Dongbo Tian<sup>b</sup>, Guodong Dang<sup>a</sup>, Daming Wang<sup>a</sup>, Chunhai Chen<sup>a</sup>, and Hongwei Zhou<sup>\*a</sup>

<sup>a</sup>Alan G. MacDiarmid Institute, Jilin University, Changchun 130012, PR China

<sup>b</sup>Beijing Institute of Satellite Environment Engineering, Beijing 100094, China

Email: [zhw@jlu.edu.cn](mailto:zhw@jlu.edu.cn)

#### Characterization:

NMR was performed on a BRUKER-300 spectrometer with DMSO-*d*<sub>6</sub> or CDCl<sub>3</sub> as solvent at 300 MHz for <sup>1</sup>H. FT-IR (spectra Fourier transform infrared spectroscopy) was recorded on a Bruker Vector22 spectrometer with KBr (potassium bromide) pellets or about 10um thick films. From the Solubility data, PI-2,3,5 have no solubility in DMSO or CDCl<sub>3</sub>, and those can't be measured with existing instruments in our lab. <sup>1</sup>HNMR spectrums of the polyimides (PI-2,3,5) were measured (Shown in Fig.1~6), and all the protons in the polyimides can be assigned clearly. For clarifying the polyimide (PI-2,3,5) structure, FTIR figure was supplied. In FT-IR spectra of PIs (Shown in Fig.7), the characteristic imide absorption bands were detected for 1782cm<sup>-1</sup> (asymmetrical C=O stretching), 1726cm<sup>-1</sup> (symmetrical C=O stretching), 1374cm<sup>-1</sup> (C-N stretching).

<sup>1</sup>H NMR spectras of polyimide was listed as follow:

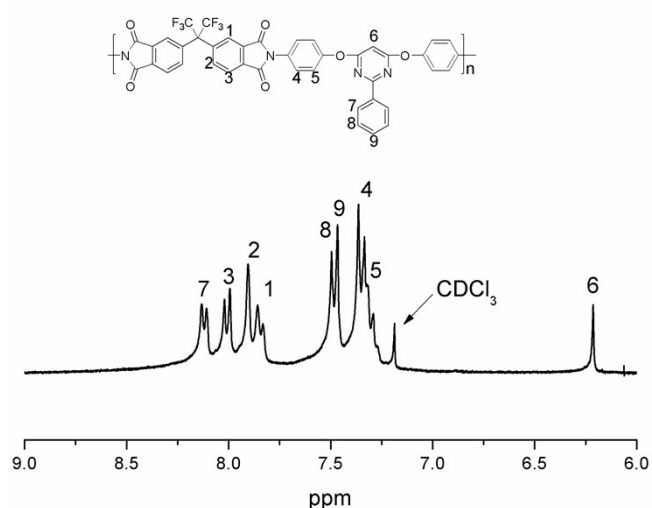

**Fig.1** <sup>1</sup>HNMR spectra of the polyimides PI-1

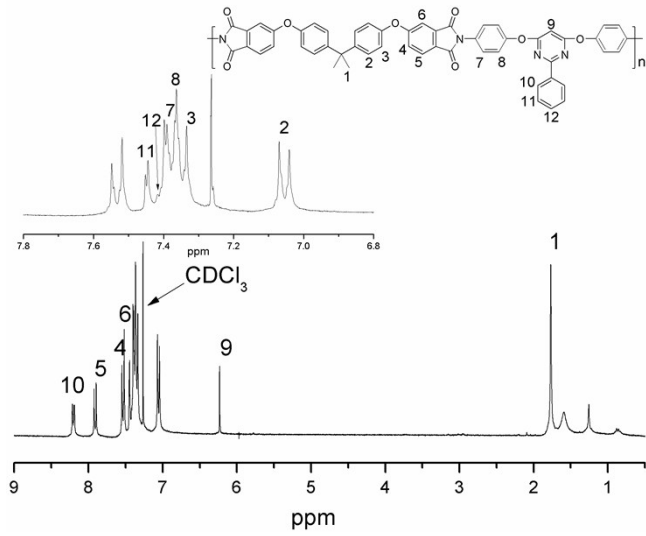

**Fig.2** <sup>1</sup>H NMR spectra of the polyimides PI-4

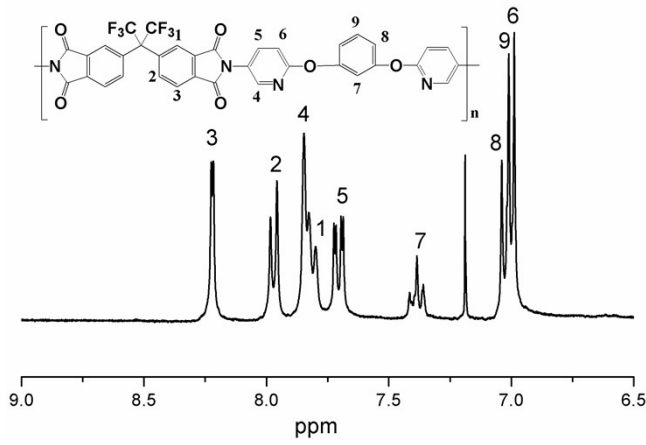

**Fig.3** <sup>1</sup>H NMR spectra of the polyimides PI-6

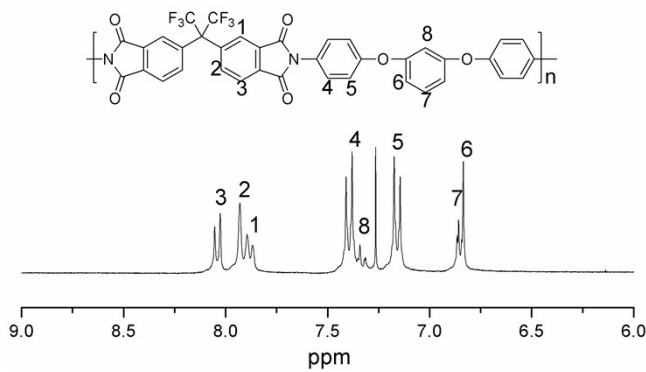

**Fig.4** <sup>1</sup>H NMR spectra of the polyimides PI-7

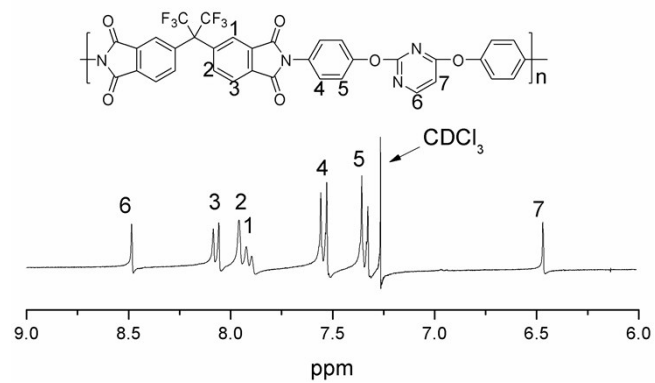

**Fig.5** <sup>1</sup>H NMR spectra of the polyimides PI-8

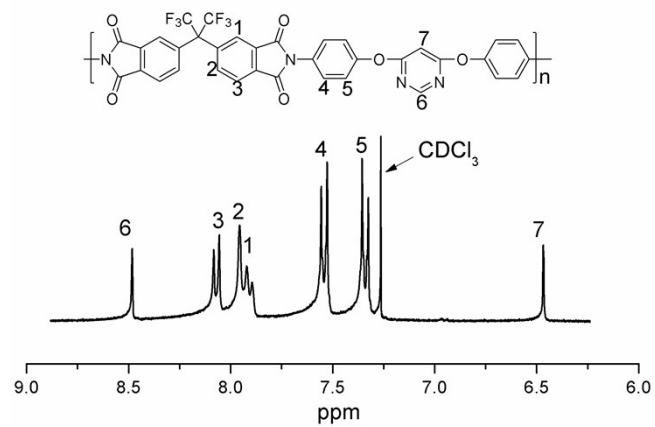

**Fig.6** <sup>1</sup>H NMR spectra of the polyimides PI-9

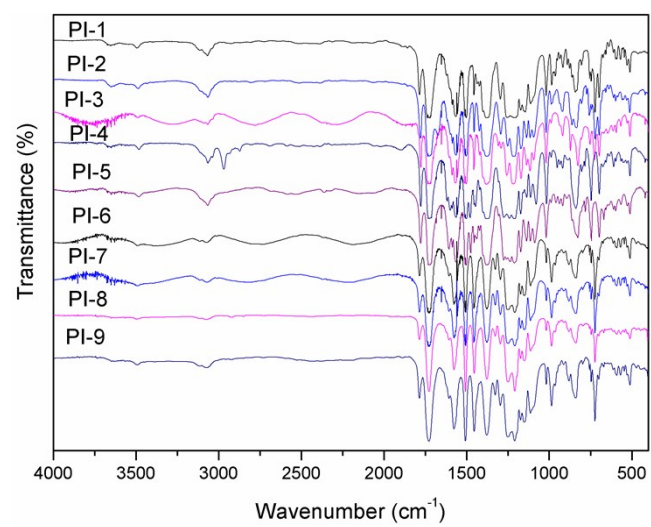

**Fig.7** FT-IR spectra of the polyimides
